# Supplementary material for: The Glaciozyma antarctica genome reveals an array of systems that provide sustained responses towards temperature variations in a persistently cold habitat
Source: PubMed Central journal article supplement (PMC5791967; doi:10.1371/journal.pone.0189947), 2018-01-31
Supplement: pone.0189947.s001.pdf [file pone.0189947.s001.pdf]

**Table A: Parameters for *G. antarctica* growing condition**

|                                 | Temperature (°C) | Days              | Exposure temperature (°C) | Days | Medium                       |
|---------------------------------|------------------|-------------------|---------------------------|------|------------------------------|
| Different exposure temperatures | 4                | 5                 | 15<br>0<br>-12            | 2    | YPD (Yeast Peptone Dextrose) |
| Different growth medium         | 4                | 7                 | -                         | -    | YNB (Yeast Nitrogen Base)    |
| Different growth phases         | 4                | 2<br>5<br>8<br>12 | -                         | -    | YPD<br>YPD                   |

**Table B: Primers used in the RT-qPCR analysis**

| Genes                                             | Primer sequences (5'-3') |
|---------------------------------------------------|--------------------------|
| Delta-6a fatty acid desaturase ( <i>DES6a</i> )   | (F) TGAGTCTCGGTTGGTGGAT  |
|                                                   | (R) GAGGAACTGAGTGGGCTTG  |
| Delta-6b fatty acid desaturase ( <i>DES6b</i> )   | (F) TCTCGTCTACCGAATCCC   |
|                                                   | (R) CGTTGCTCGCATCCC      |
| Delta-9a fatty acid desaturase ( <i>DES9a</i> )   | (F) ACCTCCTCGGATTCGCTAC  |
|                                                   | (R) GGACGCTTCTTGGA ACTCA |
| Delta-9b fatty acid desaturase ( <i>DES9b</i> )   | (F) GCGAAGGCGGGAATGA     |
|                                                   | (R) CGAGAAGCAGGACCAAAGG  |
| Delta-9c fatty acid desaturase ( <i>DES9c</i> )   | (F) CGGACGATGTGGCTCTG    |
|                                                   | (R) GGGAACGACGCTTGGA     |
| Delta-12a fatty acid desaturase( <i>DES12a</i> )  | (F) CCCTATCGGTCCCTACATC  |
|                                                   | (R) GCGGCAAGTCCTCTGGTT   |
| Delta-12b fatty acid desaturase ( <i>DES12b</i> ) | (F) GCGGGTGGAACTTTGT     |
|                                                   | (R) GTGCTTGAGTGGGAGA     |
| Delta-15 fatty acid desaturase ( <i>DES15</i> )   | (F) TACTACGGTCCGCTCAACA  |
|                                                   | (R) CTA CTCCAAAGCCCAACG  |
| Anti-freeze protein 1 ( <i>AFP1</i> )             | (F) CTCCTGCTCGTCAAAG     |
|                                                   | (R) GCCAGCGAAGTCCCTCT    |

---

|                                       |                                                    |
|---------------------------------------|----------------------------------------------------|
| Anti-freeze protein 2 ( <i>AFP2</i> ) | (F) CCTCCGCAAAGGTCATTC<br>(R) AGCATAGGCGTTTCCAGT   |
| Anti-freeze protein 3 ( <i>AFP3</i> ) | (F) ACGCTACCAACATCG<br>(R) GAAGGGAGCAACAAC         |
| Anti-freeze protein 4 ( <i>AFP4</i> ) | (F) GTGTCTCGAAAGGGAGC<br>(R) GGGACGAAGGGAGAGTT     |
| Anti-freeze protein 5 ( <i>AFP5</i> ) | (F) CTCGTCTCTCTCCTCGTCG<br>(R) GCAGGGGAAACTCCAATG  |
| Anti-freeze protein 6 ( <i>AFP6</i> ) | (F) TCTACGAGCCCGACCCA<br>(R) CCGTGACCGTGATGAGT     |
| Anti-freeze protein 7 ( <i>AFP7</i> ) | (F) CTCACCGATTATGCC<br>(R) CAAAGTCCTGCCACC         |
| Anti-freeze protein 8 ( <i>AFP8</i> ) | (F) CGACTACTGTTCGGGAGAC<br>(R) GAAGAGCGTGACGACTGAC |
| Anti-freeze protein 9 ( <i>AFP9</i> ) | (F) TTCACCGTTCAAGCCCC<br>(R) GGAGACAAATCCTTCCACAG  |

---
